# Supplementary material for: Broadening the scope of high structural dimensionality nanomaterials using pyridine-based curcuminoids
Source: PubMed Central journal article supplement — Dalton Trans. 2021 Apr 29;50(20):7056–64. doi: 10.1039/d1dt00708d (PMC8145613; doi:10.1039/d1dt00708d), 2021-04-29
Supplement: DT-050-D1DT00708D-s002.pdf [file DT-050-D1DT00708D-s002.pdf]

Supporting Information for:

## Broadening the scope of high structural dimensionality nanomaterials using pyridine-based curcuminoids

Laura Rodríguez-Cid,<sup>[a]✉</sup> Wenjie Qian,<sup>[a]✉</sup> Joseline Iribarra-Araya,<sup>[b]</sup> Álvaro Etcheverry-Berríos,<sup>[b]</sup> Eulalia Martínez-Olmos,<sup>[a]</sup> Duane Choquesillo-Lazarte,<sup>[c]</sup> Eva Carolina Sañudo,<sup>[d,e]</sup> Olivier Roubeau,<sup>[f]</sup> Ana María López-Periago,<sup>[a]</sup> Arántzazu González-Campo,<sup>[a]</sup> José G. Planas,<sup>[a]</sup> Mònica Soler,<sup>\*,[b]</sup> Concepción Domingo<sup>\*,[a]</sup> and Núria Aliaga-Alcalde<sup>\*,[a,g]</sup>

### Table of contents

|                                                                       |                       |
|-----------------------------------------------------------------------|-----------------------|
| UV-Vis spectrum of 3pyCCMoid in water                                 | Figure S1             |
| Crystallographic table                                                | Table S1              |
| Enlarged view of figures <b>3</b> , <b>4</b> and <b>5</b>             | Figures S2, S3 and S4 |
| Selected angles and distances                                         | Tables S2,S3 and S4   |
| Powder XRD simulated and experimental                                 | Figure S5             |
| Planes and angles of <b>1</b>                                         | Figure S6             |
| Geometry, and coordination environment of the metal                   | Table S5              |
| Gridding of <b>1</b> and <b>2</b> Crystals. Powder XRD                | Figure S7             |
| Thermal gravimetric analysis (TGA)                                    | Figure S8             |
| Stability of <b>2</b> after washing and conservation                  | Figure S9             |
| Decomposition of <b>2</b> in DMF-d <sub>6</sub> : NMR                 | Figure S10            |
| Decomposition of <b>2</b> in DMA: Mass spectrum                       | Figure S11            |
| Decomposition of <b>2</b> in DMA: EDX                                 | Figure S12            |
| Decomposition of <b>2</b> in DMA: SEM images in different substrates. | Figure S13            |
| SEM images of 3pyCCMoid deposited in different substrates.            | Figure S14            |
| Exfoliation of <b>2</b> :tyndall effect                               | Figure S15            |
| Exfoliation of <b>2</b> : EDX of the nanosheets                       | Figure S16            |
| Fluorescence studies                                                  | Figure S17            |

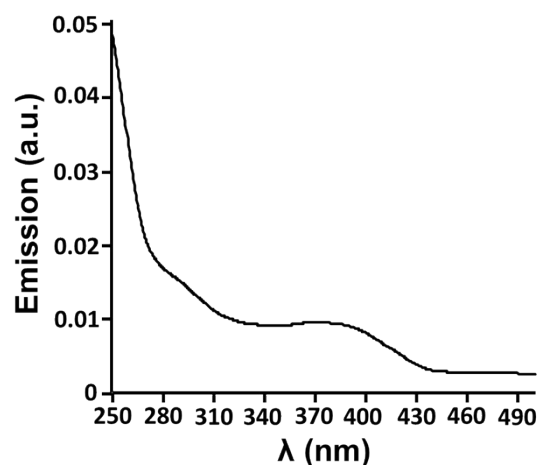

Figure S1. UV-Vis absorption spectrum between 250 and 500 nm of 3pyCCMoid in H<sub>2</sub>O.

Table S1. Crystallographic data of the CPs.

| Name                              | 3pyCCMoid                                                     | 1                                                                               | 2                                                                              | 4                                                                |
|-----------------------------------|---------------------------------------------------------------|---------------------------------------------------------------------------------|--------------------------------------------------------------------------------|------------------------------------------------------------------|
| Formula                           | C <sub>17</sub> H <sub>14</sub> N <sub>2</sub> O <sub>2</sub> | C <sub>17</sub> H <sub>13</sub> N <sub>2</sub> O <sub>2</sub> Zn <sub>0.5</sub> | C <sub>34</sub> H <sub>26</sub> N <sub>6</sub> O <sub>10</sub> Zn <sub>2</sub> | C <sub>21</sub> H <sub>25</sub> N <sub>3</sub> O <sub>7</sub> Zn |
| Formula weight                    | 278.30                                                        | 309.98                                                                          | 809.35                                                                         | 496.8                                                            |
| Crystal system                    | monoclinic                                                    | monoclinic                                                                      | monoclinic                                                                     | orthorhombic                                                     |
| Space group                       | <i>P2<sub>1</sub>/c</i>                                       | <i>C2/c</i>                                                                     | <i>P2<sub>1</sub>/n</i>                                                        | <i>P2<sub>1</sub>2<sub>1</sub>2<sub>1</sub></i>                  |
| a (Å)                             | 17.531(8)                                                     | 14.5539(12)                                                                     | 9.0611(3)                                                                      | 15.000                                                           |
| b(Å)                              | 10.383(5)                                                     | 20.3868(18)                                                                     | 14.0313(4)                                                                     | 15.360                                                           |
| c (Å)                             | 7.561(4)                                                      | 9.5213                                                                          | 28.1117(8)                                                                     | 9.980                                                            |
| α (°)                             | 90                                                            | 90                                                                              | 90                                                                             | 90                                                               |
| β (°)                             | 102.080(6)                                                    | 91.462(3)                                                                       | 95.0900(10)                                                                    | 90                                                               |
| γ (°)                             | 90                                                            | 90                                                                              | 90                                                                             | 90                                                               |
| V (Å) <sup>3</sup>                | 1345.8(11)                                                    | 2824.1                                                                          | 3560.00                                                                        | 2299.39                                                          |
| Z                                 | 4                                                             | 8                                                                               | 4                                                                              | 4                                                                |
| ρ (gcm <sup>-3</sup> )            | 1.374                                                         | 1.458                                                                           | 1.510                                                                          | 1.429                                                            |
| Temperature (K)                   | 100(2)                                                        | 100(2)                                                                          | 293(2)                                                                         | 100(2)                                                           |
| Wavelength (Å)                    | 0.7749                                                        | 0.82654                                                                         | 0.71073                                                                        | 0.729                                                            |
| μ(mm <sup>-1</sup> )              | 0.110                                                         | 1.372                                                                           | 1.412                                                                          | 1.192                                                            |
| F(000)                            | 584                                                           | 1280                                                                            | 1648                                                                           | 1024                                                             |
| Reflections collected             |                                                               | 13947                                                                           | 34882                                                                          |                                                                  |
| Independent reflections           | 3014                                                          | 2377                                                                            | 6303                                                                           | 6885                                                             |
| R <sub>int</sub>                  | 0.0576                                                        | 0.049                                                                           | 0.0417                                                                         | 0.0365                                                           |
| Parameters                        | 193                                                           | 195                                                                             | 606                                                                            | 292                                                              |
| Restraints                        | 1                                                             | 0                                                                               | 183                                                                            | 0                                                                |
| Goodness-of-fit on F <sup>2</sup> | 1.052                                                         | 1.185                                                                           | 1.070                                                                          | 1.180                                                            |
| R1 [ I>2σ(I)]                     | 0.0448                                                        | 0.0810                                                                          | 0.0554                                                                         | 0.0295                                                           |
| wR2 [ I>2σ(I)]                    | 0.1170                                                        | 0.1828                                                                          | 0.1415                                                                         | 0.0768                                                           |
| R1 (all data)                     | 0.0611                                                        | 0.0858                                                                          | 0.0790                                                                         | 0.0296                                                           |
| wR2 (all data)                    | 0.1265                                                        | 0.1859                                                                          | 0.1586                                                                         | 0.0769                                                           |

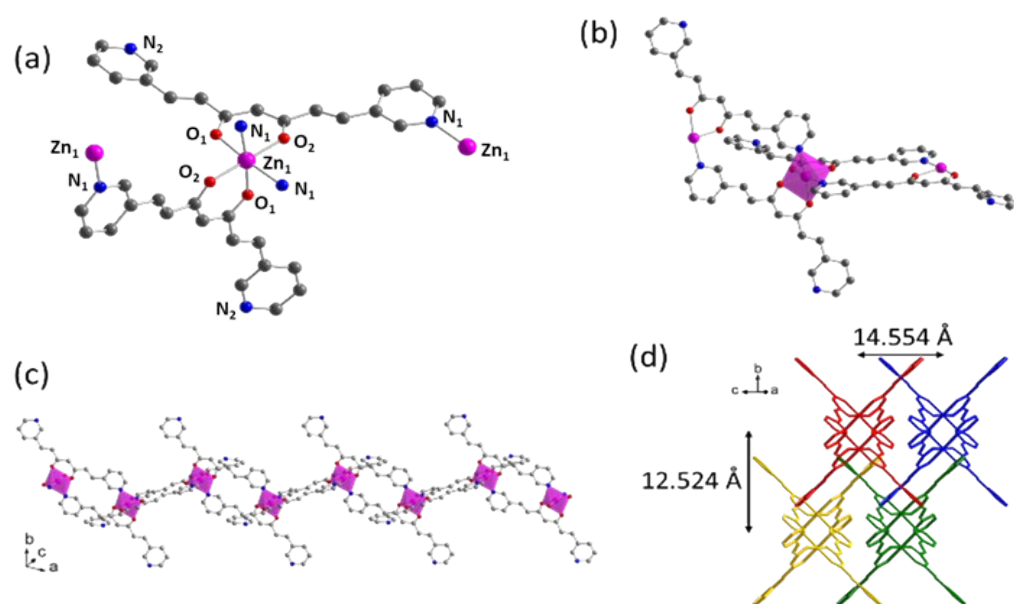

**Figure S2.** enlarged view of Figure 3. Crystal structure of **1**: (a) Representation with the coordination sphere of a Zn<sup>II</sup> centre and the coordination modes of 3pyCCMoid molecules; (b) representation of two loops connected through the intermediate Zn(II) centre; (c) extended view of one chain; (d) arrangement of four chains in the crystal. Colour legend: Zn, pink; C, grey; O, red; N, blue; H are omitted for clarity.

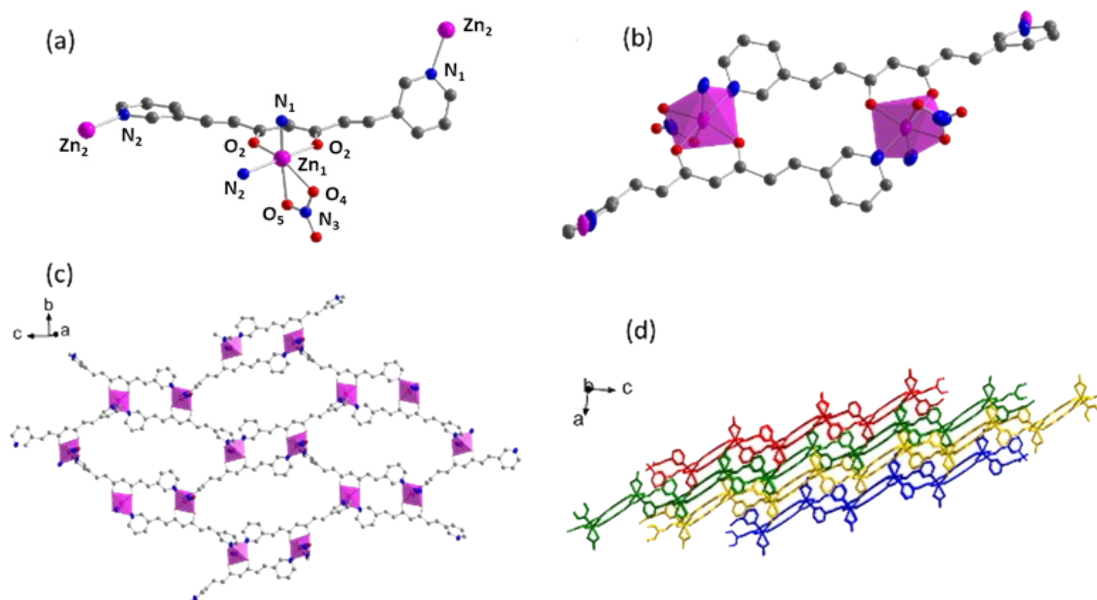

**Figure S3.** enlarged view of Figure 4. Crystal structure of **2**: (a) Representation with the coordination sphere of a Zn<sup>II</sup> centre and the coordination mode of 3pyCCMoid; (b) picture of the smallest loop in the layer; (c) 2D Zn-CCMoid layer; (d) framework consisting on packed 2D layers (each layer represented by a different colour). Colour legend: Zn, pink; C, grey; O, red; N, blue; H are omitted for clarity.

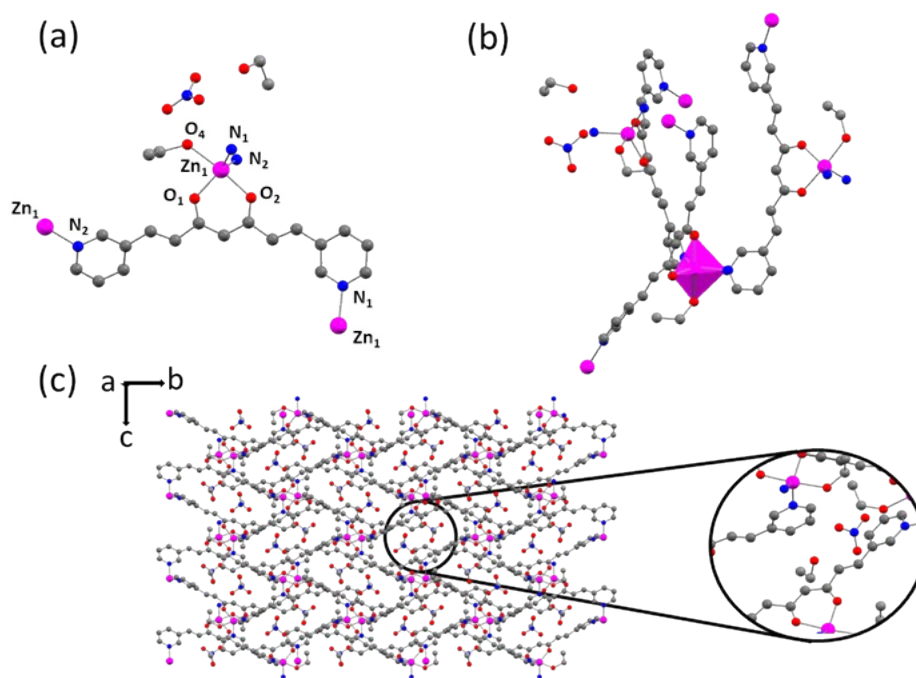

**Figure S4.** Enlarged view of Figure 5. Crystal structure of **4**: (a) Representation with the coordination sphere of a Zn<sup>II</sup> centre and the coordination mode of 3pyCCMoid; (b) picture of the connection of two neighbour CCMoids; (c) 3D **4** structure with molecules of solvent and zoom of their disposition in the cavity. (Zn, pink; C, grey; O, red; N, blue; H are omitted for clarity).

**Table S2.** Repeated unit of CP **1** with label atoms and selected angles and distances.

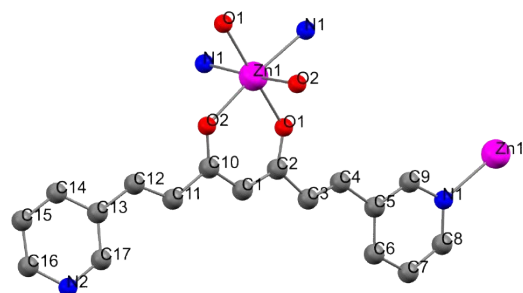

| Atoms  | Lengths [Å] | Atoms      | Angles [°] |
|--------|-------------|------------|------------|
| Zn1-N1 | 2.211       | O1-Zn1-O2  | 87.53      |
| Zn1-O1 | 2.026       | O1-Zn1-O2  | 93.79      |
| Zn1-O2 | 2.131       | O1-Zn1-O1  | 178.11     |
| C2-O1  | 1.241       | O1-Zn1-N1  | 87.02      |
| C10-O2 | 1.256       | O1-Zn1-N1  | 91.68      |
| C1-C2  | 1.394       | O2-Zn1-N1  | 87.83      |
| C1-C10 | 1.401       | O2-Zn1-O2  | 91.55      |
| N1-C8  | 1.321       | O2-Zn1-O1  | 93.79      |
| N1-C9  | 1.349       | N1-Zn1-N1  | 93.31      |
|        |             | N1-Zn1-O1  | 87.02      |
|        |             | O1'-Zn1-O2 | 87.53      |
|        |             | O1-Zn1-N1  | 91.68      |
|        |             | O2-Zn1-N1  | 87.83      |
|        |             | Zn1-O1-C2  | 129.50     |
|        |             | Zn1-O2-C10 | 124.93     |
|        |             | O1-C2-C1   | 124.88     |
|        |             | O2-C10-C1  | 126.04     |
|        |             | C2-C1-C10  | 126.48     |
|        |             | C1-C5-N1   | 167.82     |
|        |             | C1-C13-N2  | 123.28     |

**Table S3.** Repeated unit of CP **2** with label atoms and selected angles and distances.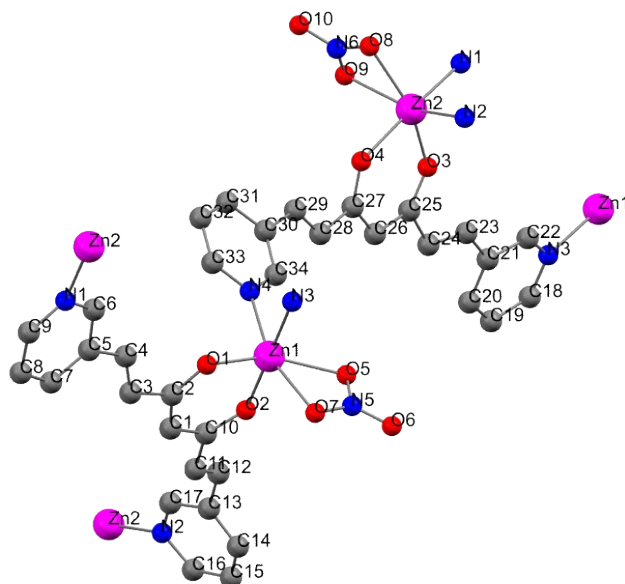

| Atoms   | Lengths [Å] | Atoms      | Angles [°] | Atoms       | Angles [°] |
|---------|-------------|------------|------------|-------------|------------|
| Zn1-N4  | 2.220       | O1-Zn1-O2  | 88.76      | O4-Zn2-O9   | 89.76      |
| Zn1-N3  | 2.189       | O1-Zn1-N3  | 88.79      | O8-Zn2-O9   | 56.21      |
| Zn1-O1  | 1.988       | O1-Zn1-O7  | 98.21      | O9-Zn2-N1   | 90.62      |
| Zn1-O2  | 2.058       | O1-Zn1-N4  | 99.78      | O8-Zn2-N1   | 92.67      |
| Zn1-O5  | 2.238       | O2-Zn1-N3  | 176.79     | O8-Zn2-N2   | 100.90     |
| Zn1-O7  | 2.272       | O2-Zn1-N4  | 98.29      | O8-N6-O9    | 116.93     |
| C2-O1   | 1.271       | O2-Zn1-O5  | 87.89      | N1-Zn2-N2   | 90.68      |
| C10-O2  | 1.264       | O2-Zn1-O7  | 89.92      | Zn2-O3-C25  | 129.11     |
| C1-C2   | 1.392       | O7-Zn1-O5  | 57.25      | Zn2-O4-C27  | 128.65     |
| C1-C10  | 1.388       | O7-Zn1-N3  | 88.39      | O3-C25-C26  | 132.90     |
| N1-C6   | 1.350       | O5-Zn1-N3  | 93.49      | O4-C27-C26  | 125.4      |
| N1-C9   | 1.333       | O5-Zn1-N4  | 105.00     | C27-C26-C25 | 119.53     |
| N1-C16  | 1.317       | O5-N5-O7   | 116.03     | C26-C30-N4  | 131.35     |
| N1-C17  | 1.326       | N3-Zn1-N4  | 84.15      | C26-C21-N3  | 168.56     |
| Zn2-N1  | 2.145       | Zn1-O2-C10 | 126.35     |             |            |
| Zn2-N2  | 2.125       | Zn1-O1-C2  | 128.27     |             |            |
| Zn2-O3  | 1.985       | O1-C2-C1   | 124.90     |             |            |
| Zn2-O4  | 2.227       | O2-C10-C1  | 125.63     |             |            |
| Zn2-O8  | 2.191       | C2-C1-C10  | 125.59     |             |            |
| Zn2-O9  | 2.311       | C1-C13-N2  | 134.88     |             |            |
| C25-O3  | 1.282       | C1-C5-N1   | 167.41     |             |            |
| C27-O4  | 1.291       | O3-Zn2-O4  | 84.27      |             |            |
| C26-C25 | 1.423       | O3-Zn2-N1  | 91.64      |             |            |
| C26-C27 | 1.392       | O3-Zn2-O9  | 102.56     |             |            |
| N3-C18  | 1.337       | O3-Zn2-N2  | 100.25     |             |            |
| N3-C22  | 1.336       | O4-Zn2-N1  | 175.88     |             |            |
| N4-C33  | 1.340       | O4-Zn2-N2  | 90.56      |             |            |
| N4-C34  | 1.361       | O4-Zn2-O8  | 90.95      |             |            |

**Table S4.** Repeated unit of CP **4** with label atoms and selected angles and distances.

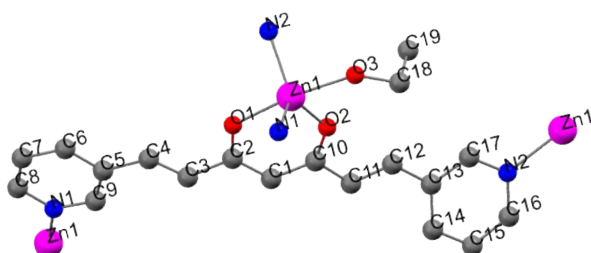

| Atoms  | Lengths [Å] | Atoms      | Angles [°] |
|--------|-------------|------------|------------|
| Zn1-N1 | 2.067       | O1-Zn1-O2  | 88.80      |
| Zn1-N2 | 2.054       | O1-Zn1-N1  | 89.60      |
| Zn1-O1 | 2.077       | O1-Zn1-N2  | 93.68      |
| Zn1-O2 | 1.966       | O1-Zn1-O3  | 172.81     |
| Zn1-O3 | 2.142       | O2-Zn1-N1  | 117.53     |
| C2-O1  | 1.271       | O2-Zn1-N2  | 120.89     |
| C10-O2 | 1.280       | O2-Zn1-O3  | 85.25      |
| C1-C2  | 1.410       | O3-Zn1-N1  | 89.58      |
| C1-C10 | 1.402       | O3-Zn1-N2  | 92.84      |
|        |             | N1-Zn1-N2  | 121.53     |
|        |             | Zn1-O1-C2  | 125.03     |
|        |             | Zn1-O2-C10 | 127.48     |
|        |             | O1-C2-C1   | 125.23     |
|        |             | O2-C10-C1  | 125.58     |
|        |             | C2-C1-C10  | 124.32     |
|        |             | C1-C5-N1   | 124.06     |
|        |             | C1-C13-N2  | 169.85     |

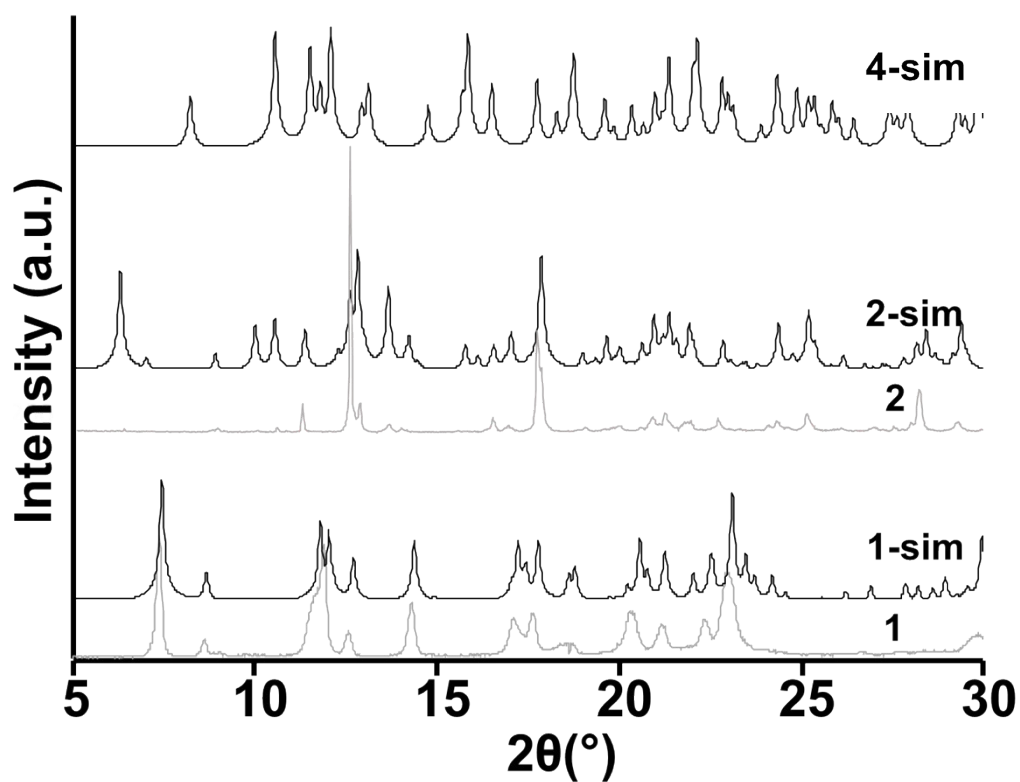

**Figure S5.** Comparison between the powder XDR of all the CPs (**1,2** and **4**), either simulated from the crystal structure with mercury (black) and/or obtained experimentally (grey).

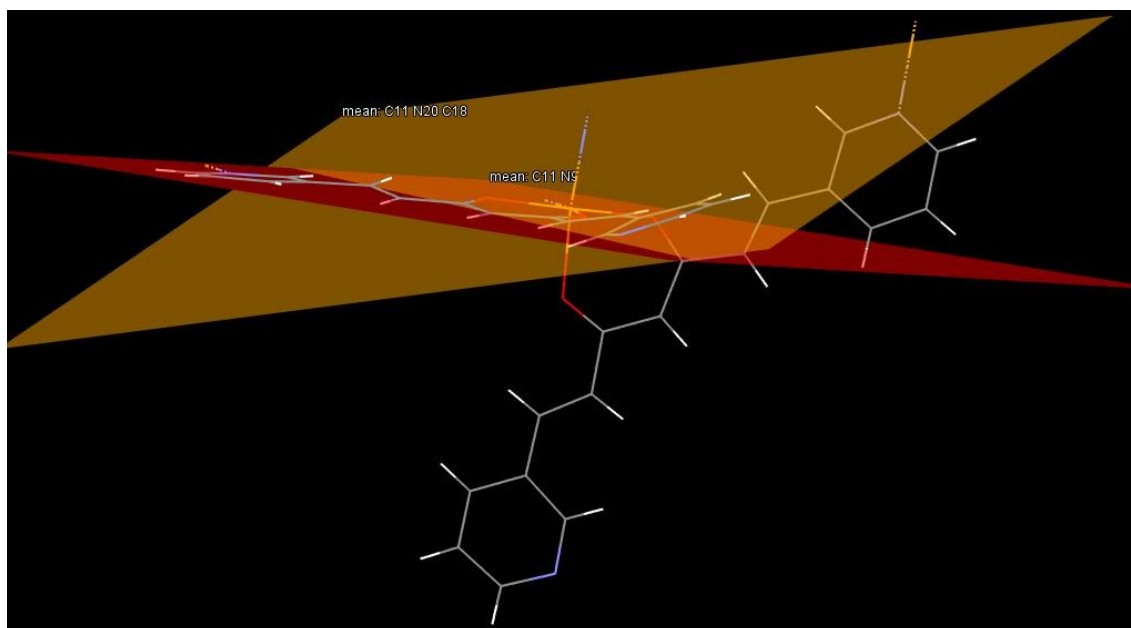

**Figure S6.** The two planes used in to measure planarity were made by using the *meta*- positions of the aromatic rings and the central carbon of the studied 3pyCCMoid, hence N'-C<sub>8</sub>-C<sub>1</sub> and N-C<sub>8</sub>-C<sub>1</sub> atoms from Figure 1 in the main manuscript.





**Table S5.** Geometry, and coordination environment of the metal in the CP structures.

| CPs | Metal coordination | Metal geometry            | Metal coordination environment                                                      |
|-----|--------------------|---------------------------|-------------------------------------------------------------------------------------|
| 1   | Hexacoordinate     | Pseudo-octahedral         |  |
| 2   | Hexacoordinate     | Pseudo-octahedral         |  |
| 4   | Pentacoordinate    | Pseudo-trigonal bipyramid |  |

  


(a)

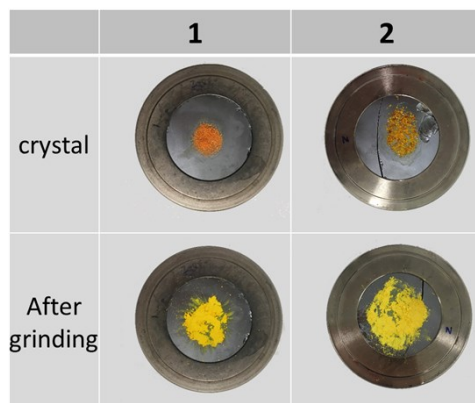

(b)

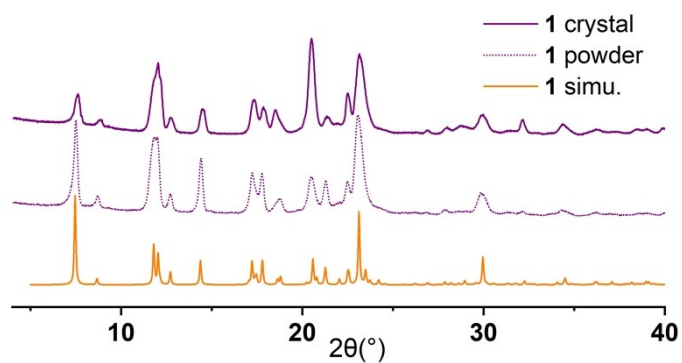

(c)

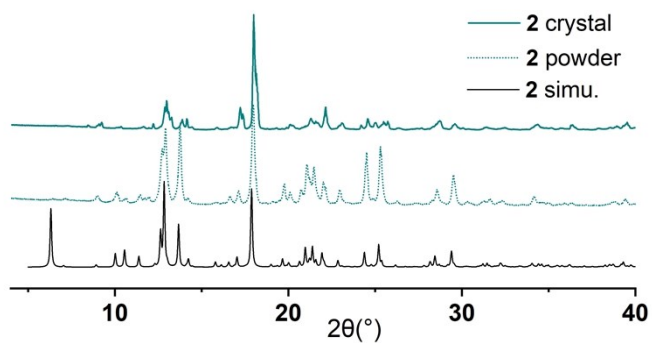

**Figure S7.** (a) Optical picture of samples **1** and **2** before and after grinding. Powder X-ray diffraction of **1** (a) and **2** (b). In both cases, the patterns are displaying the recorded experimental data from the single-crystal (top), the bulk crystalline sample, after grinding, (middle) and the simulated profile from the single-crystals structure (bottom).

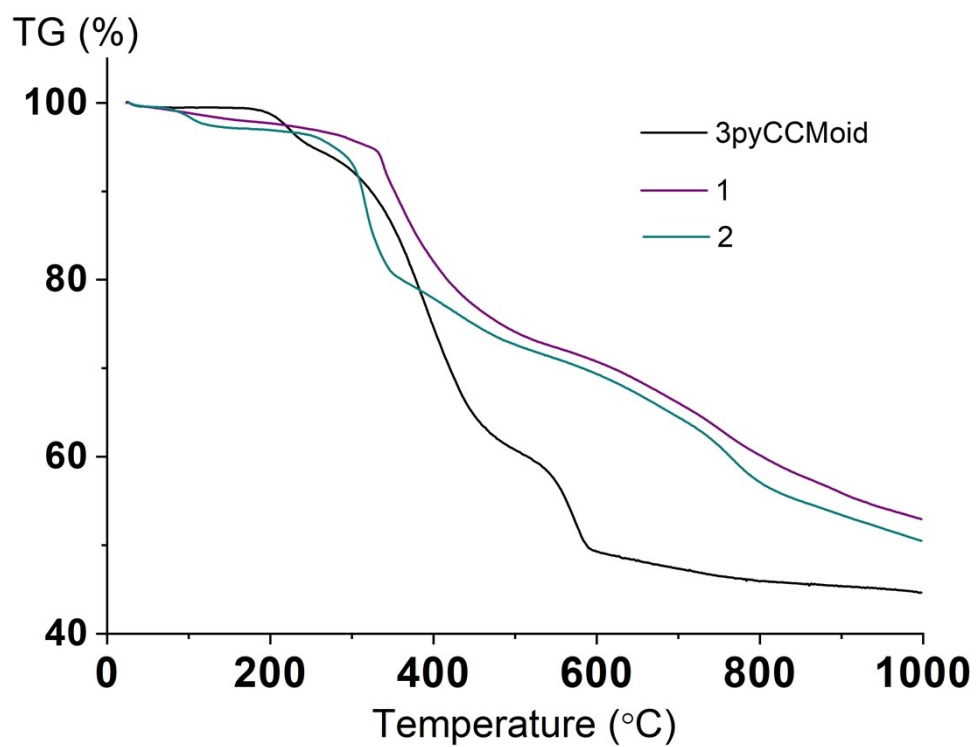

Figure S8. TGA analyses of 3pyCCMoid, and compounds 1 and 2.

(a)

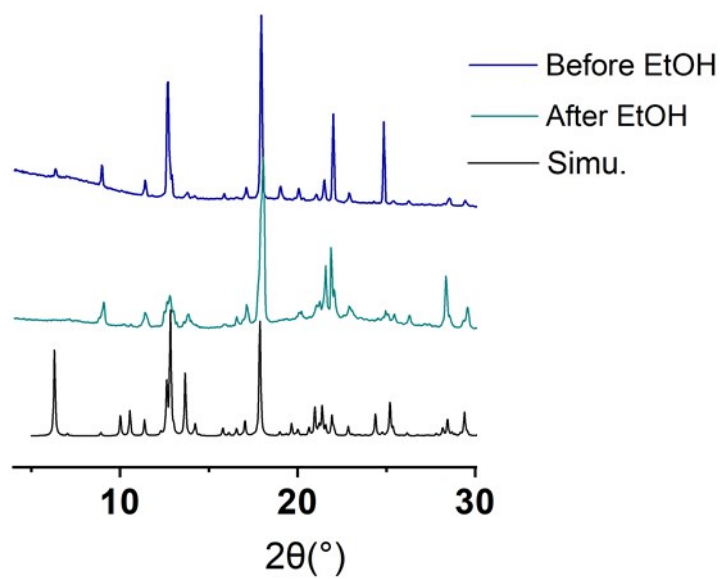

(b)

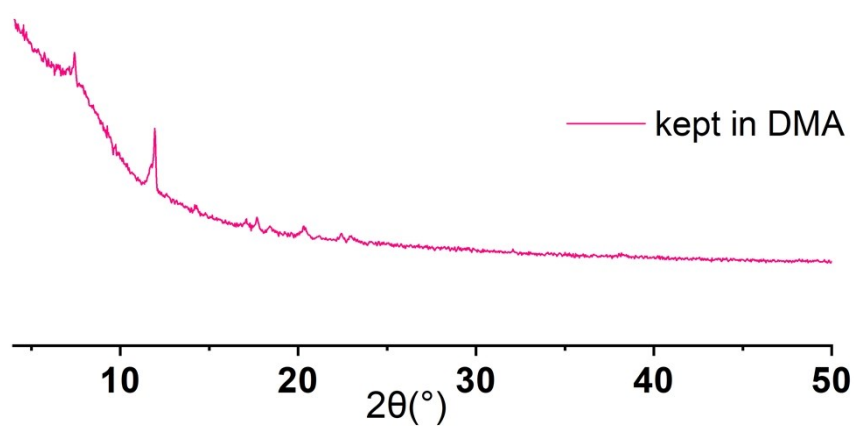

**Figure S9.** Powder XRD patterns of **2** (a) before and after washing with EtOH, together with the simulated profile from single-crystal structure, and (b) kept in DMA overnight.

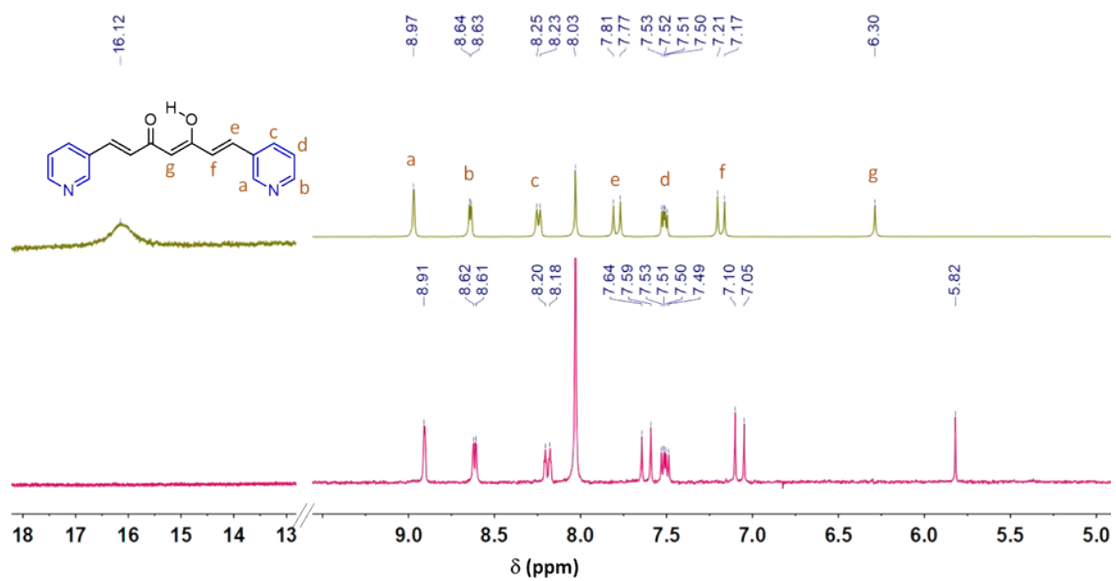

Figure S10.  $^1\text{H}$  NMR in  $\text{DMF-d}_7$  of 3pyCCMoid and a sample of 2.

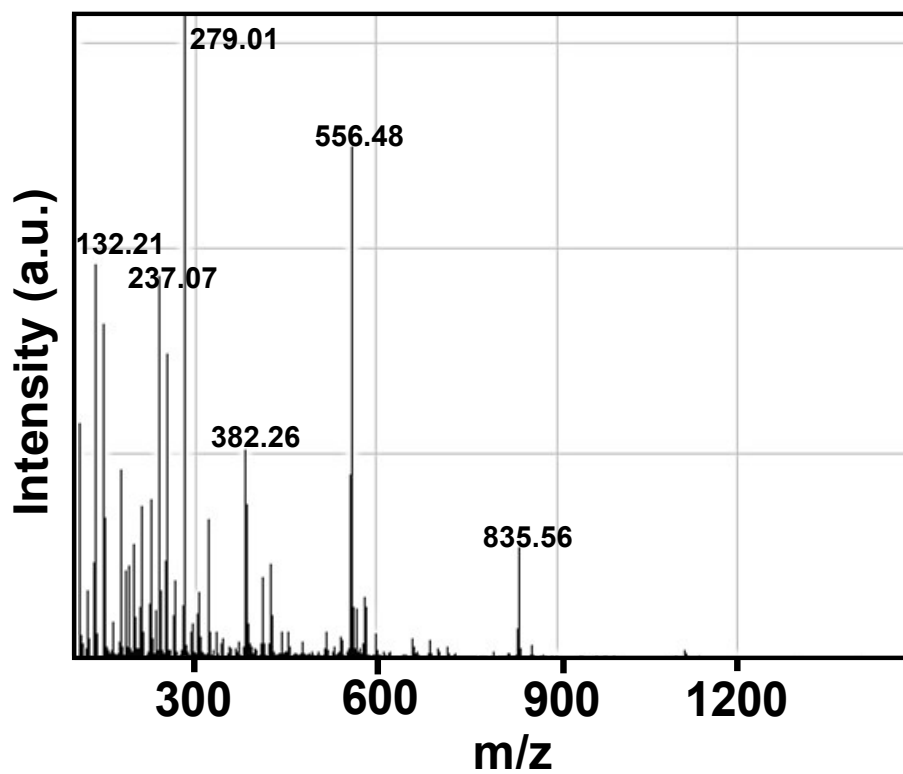

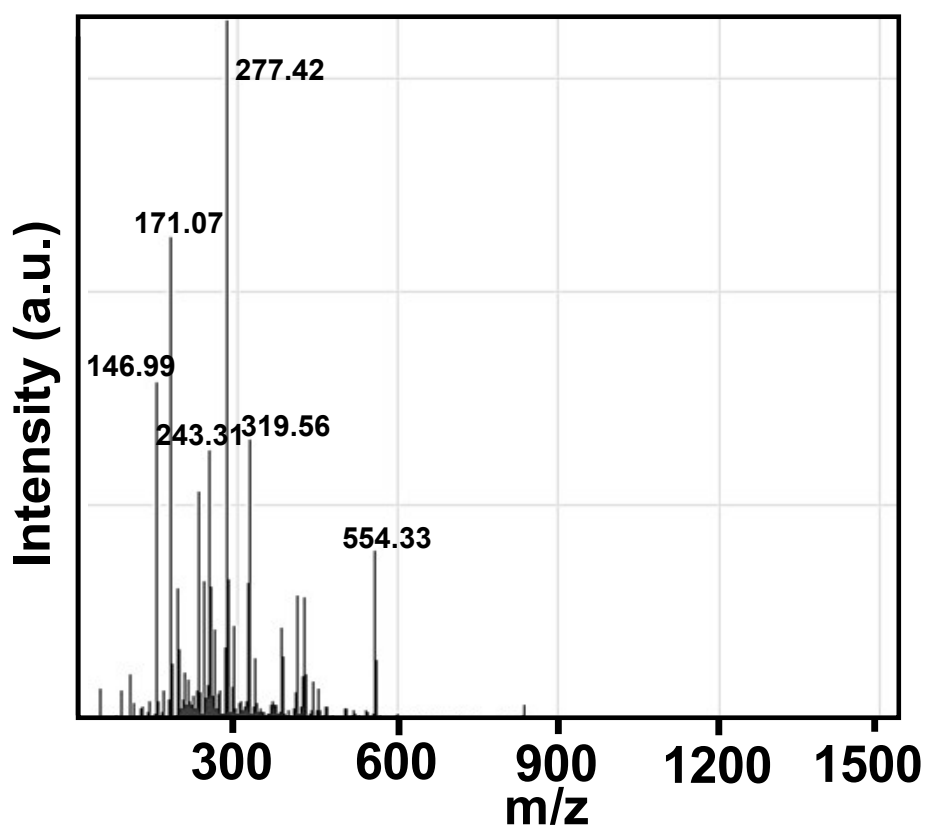

**Figure S11.** Mass spectrum of **2** after its partial re-dissolution in DMA, positive (top) and negative mode (down).

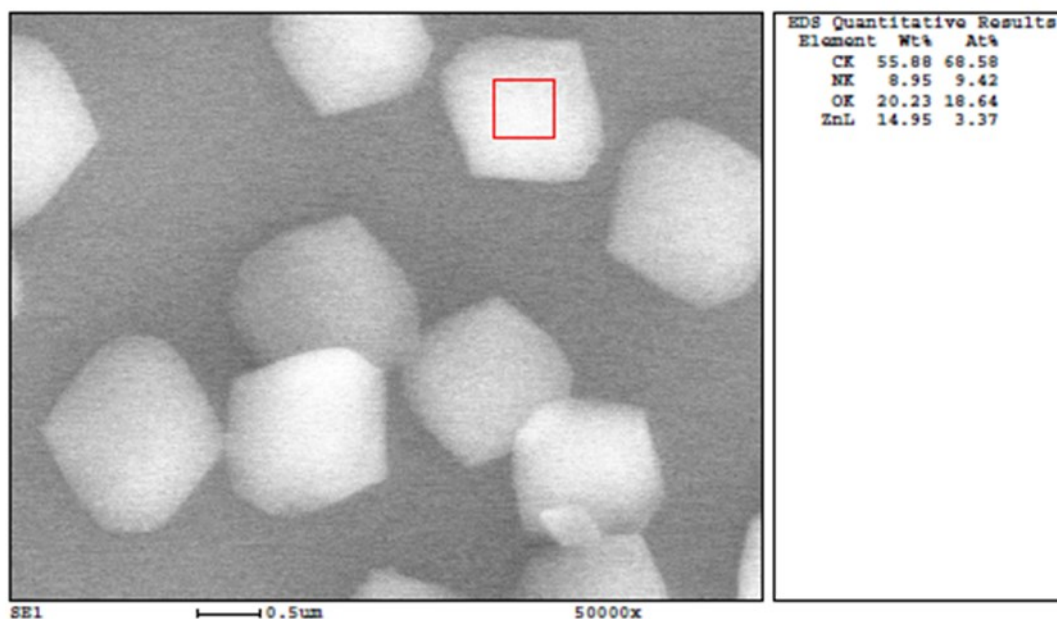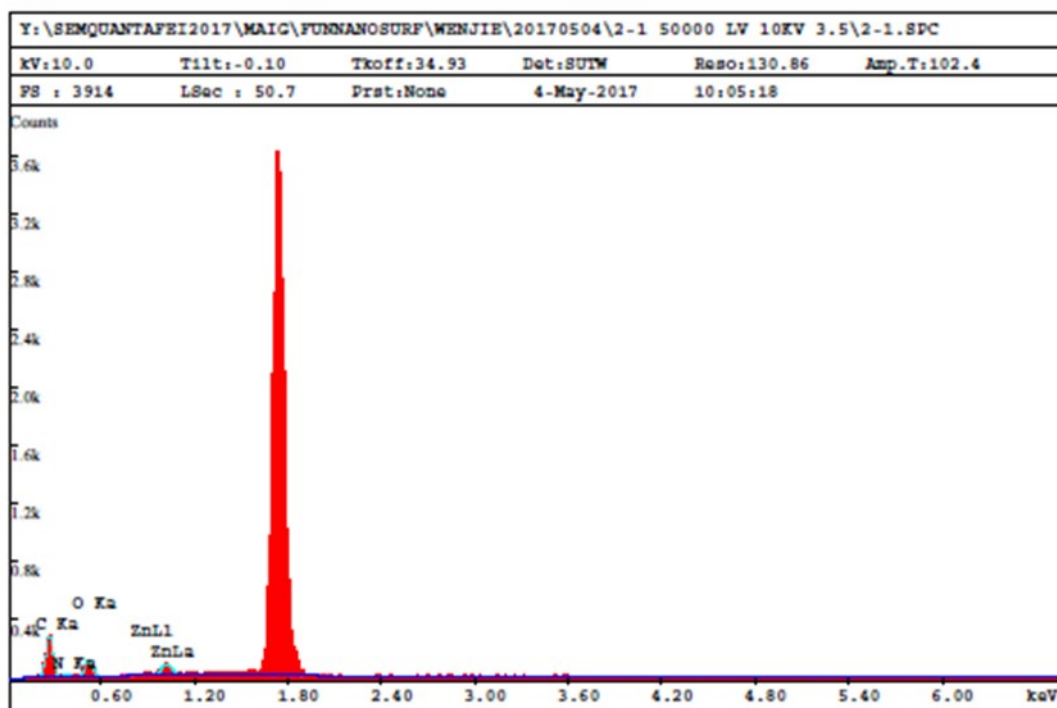

**Figure S12.** EDX spectrum of the cubes formed after re-dissolution in DMA of compound **2**, showing the same elements than the original crystal (C, O, N and Zn).



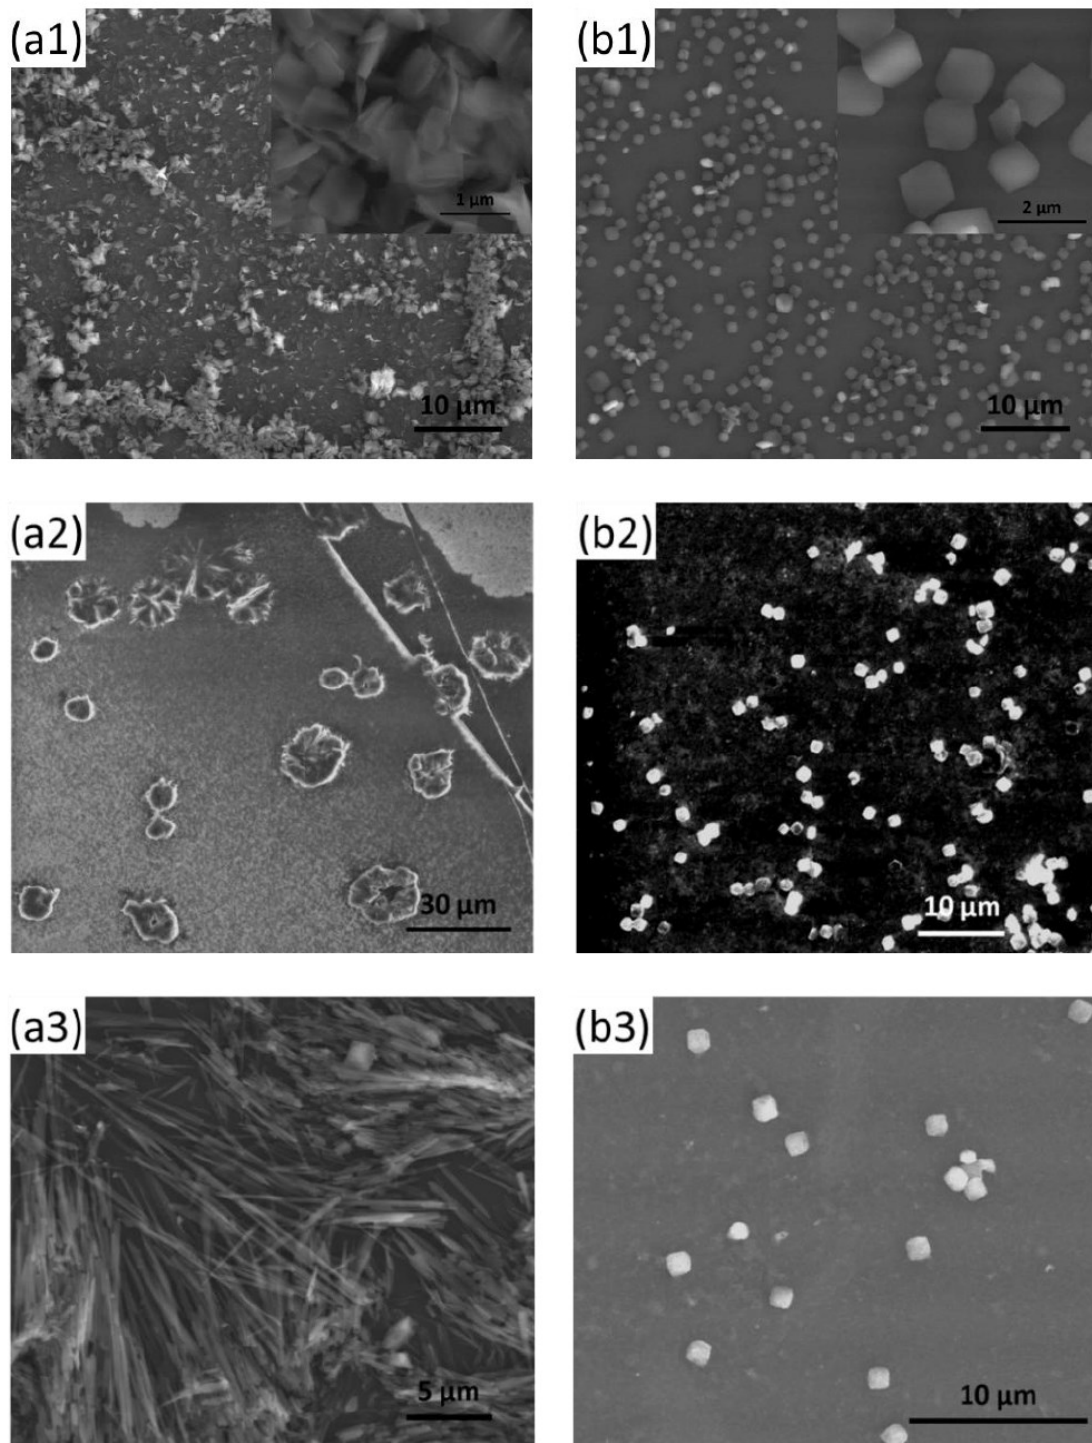

**Figure S13.** SEM images of 2 place onto different substrates of after adding DMA: (a1-3) aggregates from the unfiltered solution and (b1-3) solid part that remained after the addition of DMA. Numbers 1, 2 and 3 in (a) and (b) relate to SiO<sub>2</sub>/Si, mica and HOPG surfaces, respectively.

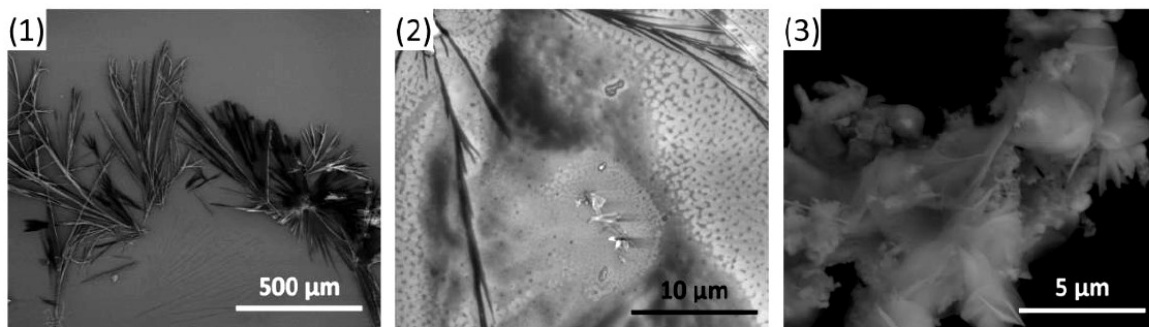

**Figure S14.** SEM images of 3pyCCMoid in different substrates: (1) SiO<sub>2</sub>/Si wafer, (2) mica and (3) HOPG.

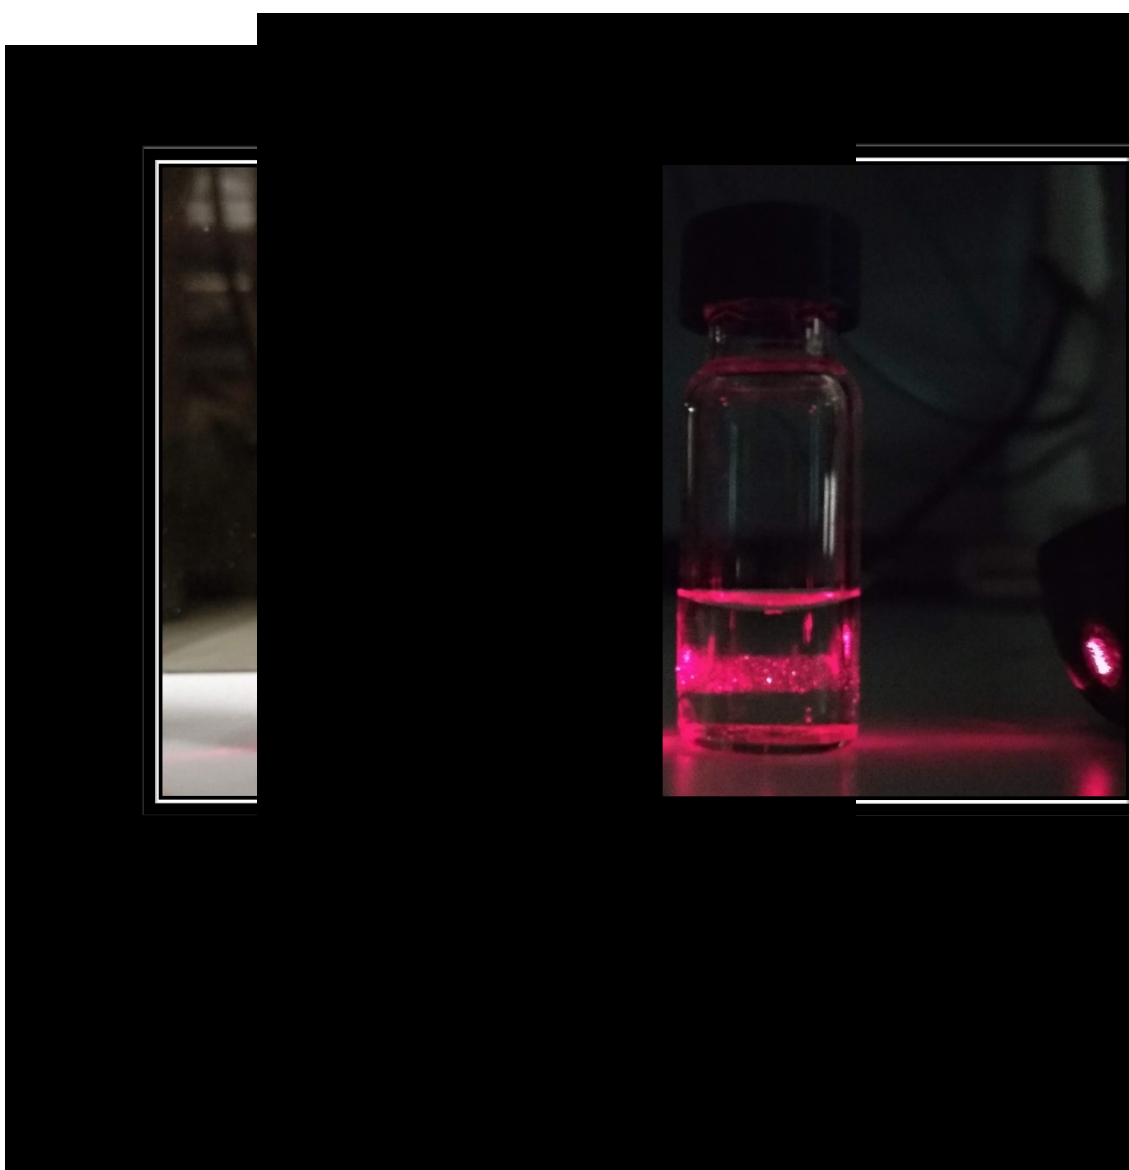

**Figure S15.** Appearance of a vial involving exfoliated 2 after 6h of resting. The largest nanosheets are precipitate at the bottom of the vial (left image) while smaller nanosheets remain dispersed in the solution, which is detected by Tyndall effect (right image).

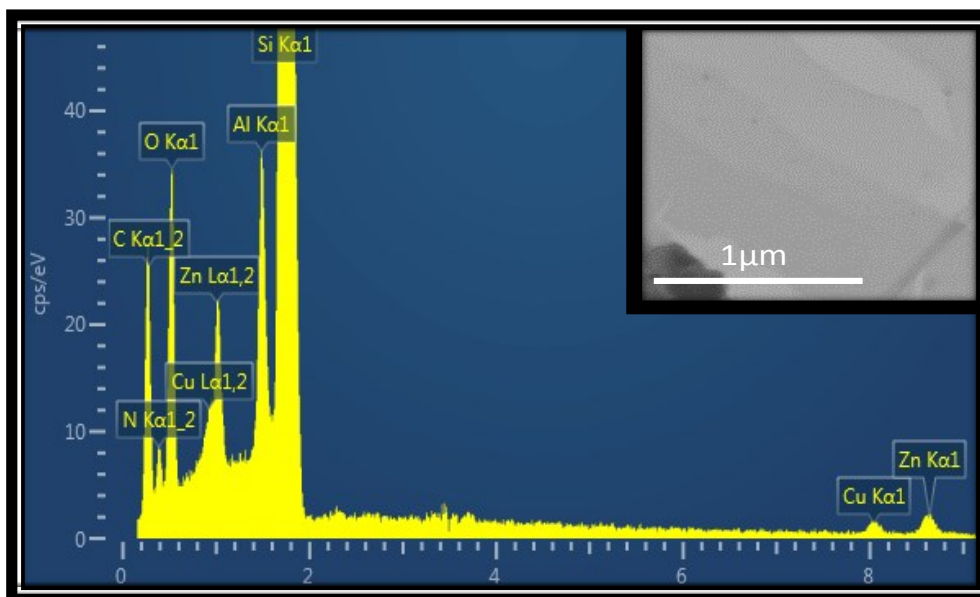

**Figure S16.** EDX spectrum of a single nanosheet of **2** displayed in the STEM picture, showing the same elements than the original crystal (C, O, N and Zn). Cu, Al and Si are related with the SEM components and the grid where the nanosheets are deposited.

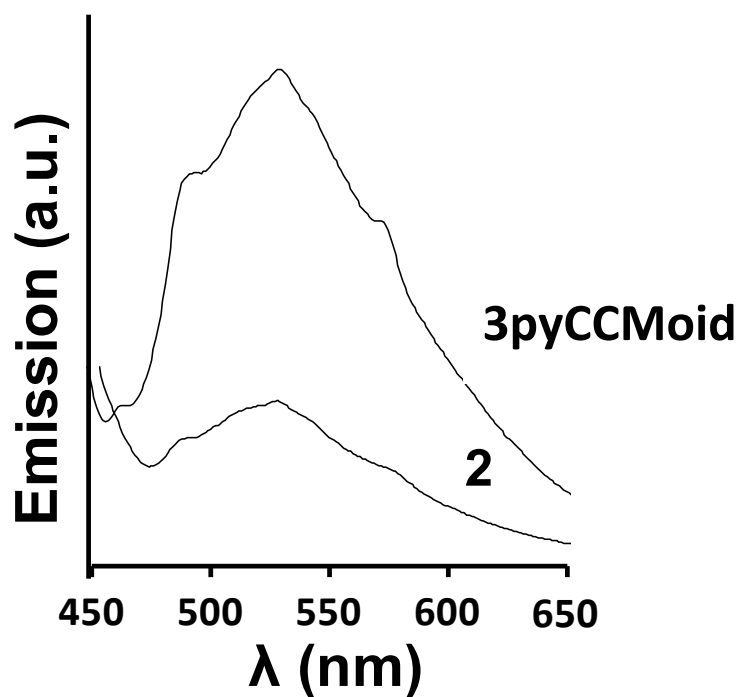

**Figure S17.** Fluorescence spectra of 3pyCCMoid ( $\lambda_{\text{max}}=531$  nm) and **2** ( $\lambda_{\text{max}}=530$ nm).  $\lambda$  of excitation: 420 nm, excitation and emission slits 10 for **2**, and 5 for 3pyCCMoid, in that order.
